# Supplementary material for: Regulatory sites for splicing in human basal ganglia are enriched for disease-relevant information
Source: PubMed Central journal article supplement (PMC7042265; doi:10.1038/s41467-020-14483-x), 2020-02-25
Supplement: 41467_2020_14483_MOESM1_ESM.pdf [file 41467_2020_14483_MOESM1_ESM.pdf]

## Supplementary Tables

|                                                 | eQTL PUTM %<br>overlap | eQTL SNIG %<br>overlap |
|-------------------------------------------------|------------------------|------------------------|
| <b>Brain_Amygdala.v7</b>                        | 26.5                   | 50.9                   |
| <b>Brain_Anterior_cingulate_cortex_BA24.v7</b>  | 37.8                   | 57.3                   |
| <b>Brain_Caudate_basal_ganglia.v7</b>           | 48.2                   | 59.9                   |
| <b>Brain_Cerebellar_Hemisphere.v7</b>           | 46.2                   | 59.3                   |
| <b>Brain_Cerebellum.v7</b>                      | 53.3                   | 62.0                   |
| <b>Brain_Cortex.v7</b>                          | 45.7                   | 61.8                   |
| <b>Brain_Frontal_Cortex_BA9.v7</b>              | 40.3                   | 58.6                   |
| <b>Brain_Hippocampus.v7</b>                     | 30.6                   | 54.7                   |
| <b>Brain_Hypothalamus.v7</b>                    | 29.7                   | 59.9                   |
| <b>Brain_Nucleus_accumbens_basal_ganglia.v7</b> | 41.9                   | 59.5                   |
| <b>Brain_Putamen_basal_ganglia.v7</b>           | 39.3                   | 57.8                   |
| <b>Brain_Spinal_cord_cervical_c-1.v7</b>        | 24.7                   | 51.3                   |
| <b>Brain_Substantia_nigra.v7</b>                | 19                     | 50.6                   |
| <b>PsychENCODE</b>                              | 72.5                   | 57.1                   |
| <b>CommonMind</b>                               | 54.2                   | 55.9                   |
|                                                 |                        |                        |

Supplementary Table 1

Table of eQTL replication rates across all GTEx brain-specific eQTL datasets

| Region          | Relationship to known gene | Number of samples tested in total | Number of samples region validated in | Forward Primer (5'-3')    | Reverse Primer (5'-3')        | Predicted Amplicon (bp) | Representative Sanger Sequence                                                                                                                                                                                                                                                                                                                          |
|-----------------|----------------------------|-----------------------------------|---------------------------------------|---------------------------|-------------------------------|-------------------------|---------------------------------------------------------------------------------------------------------------------------------------------------------------------------------------------------------------------------------------------------------------------------------------------------------------------------------------------------------|
| <b>DER10633</b> | High                       | 4                                 | 2                                     | CAGATGATGG<br>CCGGTGAAG   | CAGGAAGTGT<br>TTGGGATGAG<br>C | 229                     | GTCTGCAATACATATTGCTGTGGGCTGCTGA<br>GCAGACGATAGACAGTGGGGCAGGCTGGC<br>AGCCGTCAGAACAAAAGGGCTTTCTTCTTAA<br>GGTCATTCTCTTCCAGAGGGCCAGGCGGT<br>CAAACCTCTCGATGCTCATCCC                                                                                                                                                                                          |
| <b>DER27107</b> | High                       | 3                                 | 3                                     | GGTTCTGCCTG<br>ACATAGACAC | TCAGGTGACA<br>GGAGGAAGC       | 286                     | TGTGGAAGGGGAAAATTGCATTCATTTAAAG<br>TGTTGATGTATCACCTCCCCAAAAGTGTGG<br>AGTCTGCCAGATTCTTAAGTGAAGACTGG<br>AGAAAAATCCCCTCATGCATCTGGGTGGGA<br>GTAGCCATTTGAAAATATGCCAGAGCATTCT<br>GTTCTTTAAAAAGGCCTACTGTTGTGAGAT<br>ATTGTTTTATCAAACCTGTTGACCTGGAGG<br>AAGGGAAATATCCAACCCAGCCCTGCAGAG<br>GCTTCCTCTGTACCTGAA                                                     |
| <b>DER28209</b> | High                       | 7                                 | 3                                     | CGCCAATCTCA<br>TACAAGCCA  | AGGCTATCTTC<br>AGACACGCA      | 537                     | CACTGCTGGGATGAATTCACATACACCTGAA<br>AACAGCCCTGACTGGCGGTGGGACTCAGTG<br>CAGGTGGGAAAATGACAAGAAAGTATTGCA<br>CAGGAGGAGGAAAGCTGGTGGGGAAGCTA<br>TCTCACTTGCAAAGTAAATGGCTTGTATG                                                                                                                                                                                   |
| <b>DER1571</b>  | Moderate                   | 6                                 | 3                                     | CATTCATTGTC<br>TTCGGAGCCA | TTGCCCAACTG<br>ACAACATCTC     | 321                     | GTATGGCCTCCACCTTGCTTCTACCTTCCAAG<br>CTCCATTTGTATCTGATTGAAGGAAACCAA<br>CTGCACCTGGCTGCAAGGGGTAAACTTATCT<br>TAGCCAGAGGCATAAAAGACGATCCTTTGC<br>TTCTTAGGGGAATCTGGGGCTCTTCACTTG<br>ATCATCTGAGTCTTTCATCTGCATCATAAAA<br>TTCTTCCTTCTCCTCACTCTCACTCCCTAAAG<br>AGCTCTCCTTGCCACACACTGTTGGGGGTC<br>CAAAGCCTGTAAAGATAATGCTTCTTCTCCC<br>AGCCTGCGATACGAATACACCTGAAGGTCG |

|                   |          |   |   |                           |                           |     |                                                                                                                                                                                                                                                                                                                                                                                             |
|-------------------|----------|---|---|---------------------------|---------------------------|-----|---------------------------------------------------------------------------------------------------------------------------------------------------------------------------------------------------------------------------------------------------------------------------------------------------------------------------------------------------------------------------------------------|
|                   |          |   |   |                           |                           |     | GAGAATGTTTCTAGCAGCGGACTGTTAAGG<br>GTC                                                                                                                                                                                                                                                                                                                                                       |
| <b>DER14229</b>   | Moderate | 7 | 4 | GAGTGAGGCC<br>GGTTACATTC  | GCTTAACCACT<br>TCCAGGACAC | 600 | GTTCAACCATGTAGAGGACATAGCGCTCAGT<br>CTTATCTTCTGGGACGGAGTCCTCATAGTGA<br>GGGCAGAAAACATCCAGGTAGTCATTGATA<br>CAGACATCAATATGGTAGTCACCCCTCTGGA<br>ATCTGGGGTTGCTGCTGTTCCAGTAGACAGC<br>GTAGCGGTGCGCGACGGCCTTGGAGCCCGG<br>GTCCTGGCTGAACACACACATCCAGAGCAC<br>CAGAAACACCAGCGTCAACATCTCCACGTGC<br>AACATCACGCCTGGCCAGCGGCGGAGCCCC<br>CGACGCGCCACGGGCGGTGCGCCGAGAAG<br>GGTGGGGATCCGGAGCCGCAACCCAGCCTT<br>G |
| <b>DER18381</b>   | Moderate | 7 | 1 | TCTTCTGCCAT<br>TCACTCAGGT | CTATGCGGTTT<br>TTTCAGCCA  | 412 | GCGAGGGGCGGAGGTGATGTGCTAGGCCT<br>GAATTCAAGAGGGGGCGCAGCCACAGGCC<br>CCGCGATGCCGGGGTGGCCTCTTGTAAACGA<br>CGTTTTAACCGCTGACCTAAGTGGATCCGCT<br>CCTCTCCCGCCGCCGCTCCCTGCCTGCAGC<br>ACAGGATGGCGGCTGGCTTTCCCGAGTGGG<br>CGCAGGATAGCAGCATCAAGGAGCATTGTG<br>TACATGCAGAAGTGCACAGTACCTGGAGTG<br>AAACTGCTTGTGTTGATTCTGATACCATT<br>ATAACTGGCTGTGTGATCTCAAAACCTCTAA<br>AATGCAGACCTCCAGCTCTAGATC                |
| <b>DER15834/5</b> | Low      | 4 | 4 | ACGTGTTCTT<br>GCTGTGTATC  | CAGTGGCAGA<br>GTTTGAGAGG  | 533 | TCCTCTCTGAAGAACTCCTGACCAGAAGCTC<br>CCTTTCTGTGTGGCTAGATTCTTTAACTATT<br>TGACACTTCTTTCATTCTTCTGCAGTTGGTCT<br>GAATGCATTCTGGGTGAAACAGCTCAGAA<br>GACTGGCTCACTGCAGCAGTGCATGCTTC<br>AGGCTGATGCTAAGGCATAACACATCATTGT<br>TGAGATCAGCTCCAACTGGAACATATTTAC<br>TGAGTGAATGGCTTAATGTCTGCTGACTCAT                                                                                                            |

|                    |     |   |   |                           |                            |     |                                                                                                                                                                                                                                                             |
|--------------------|-----|---|---|---------------------------|----------------------------|-----|-------------------------------------------------------------------------------------------------------------------------------------------------------------------------------------------------------------------------------------------------------------|
|                    |     |   |   |                           |                            |     | GGCTGATTAGGGTGATAACTGCTGAAGGCT<br>CAGGTGGCTGTGGCAATTTCTTAAACATGA<br>CAACTGAAGTTTGCTGCATCAGTTGATTC<br>TTCCTTTCATGAACTATTTCTGTGGTATGT<br>GATGCTGTTAATAGCATTTTACCCACAGAA<br>CTCTCAAAGTTGG                                                                      |
| <b>DER34755/68</b> | Low | 4 | 4 | GAGTTGGAGT<br>TTGCTGTTTCG | AGTGGCTCTTA<br>CTCACAGTTTC | 274 | GTGATTCTCCTGCCTCAGCCACCACCATTTA<br>ACACTGAGAAGTGGGCAGTCACAGAGAAAA<br>AGTTTAGAATAGTTCACCAGTGAAGTCATCT<br>CAACCAGCACAGGGCCTTGACTCCTAACAAC<br>AATCACACGAACTTGGAAGAGGAGCCTTCC<br>CCAACCTGAACCTTCGCTTGAGACCTCGTCCT<br>TGGCCATCCTCTACATCTGGATTTCATGATAC<br>AGAGAA |

Supplementary Table 2

Table of i-eQTL target region validation

## Supplementary Figures

a)

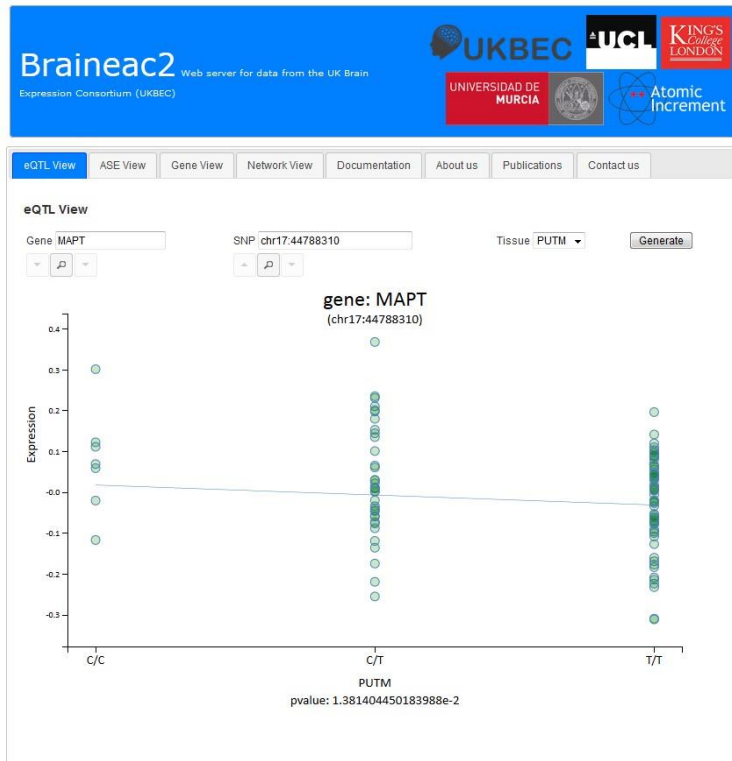

b)

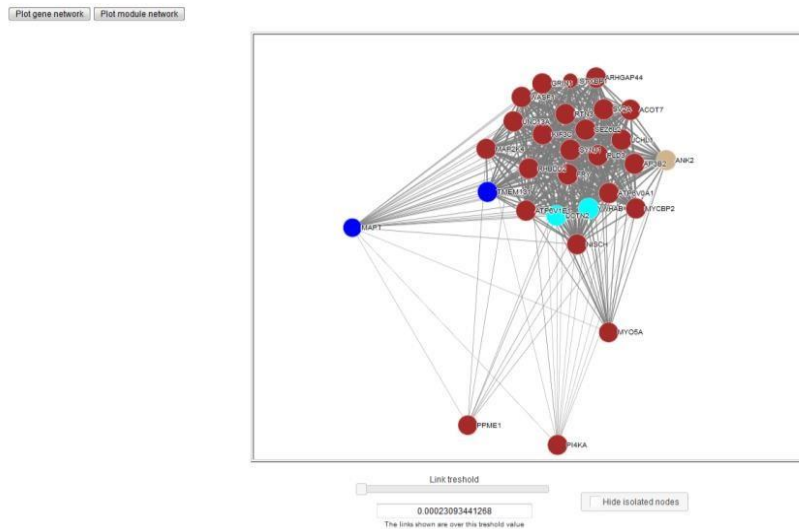

### Supplementary Figure 1

Screenshots to show the information accessible through the BRAINEAC web resource

a) Use of BRAINEAC to access eQTL data. b) Use of BRAINEAC to access gene co-expression network data.

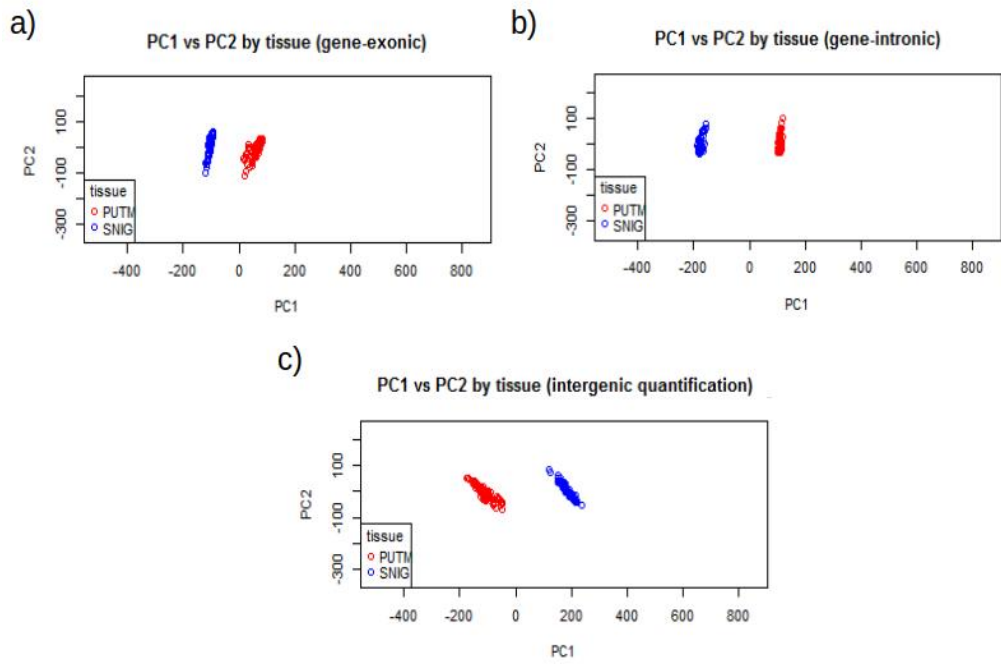

Supplementary Figure 2

Scatter plots to show the first (X-axis) and second (Y-axis) principal components for gene-exonic (a) gene-intronic (b) and transcribed intergenic (c). Samples originated from putamen are coloured in red and samples originated from substantia nigra are coloured in blue. Source data are provided as a Source Data file.

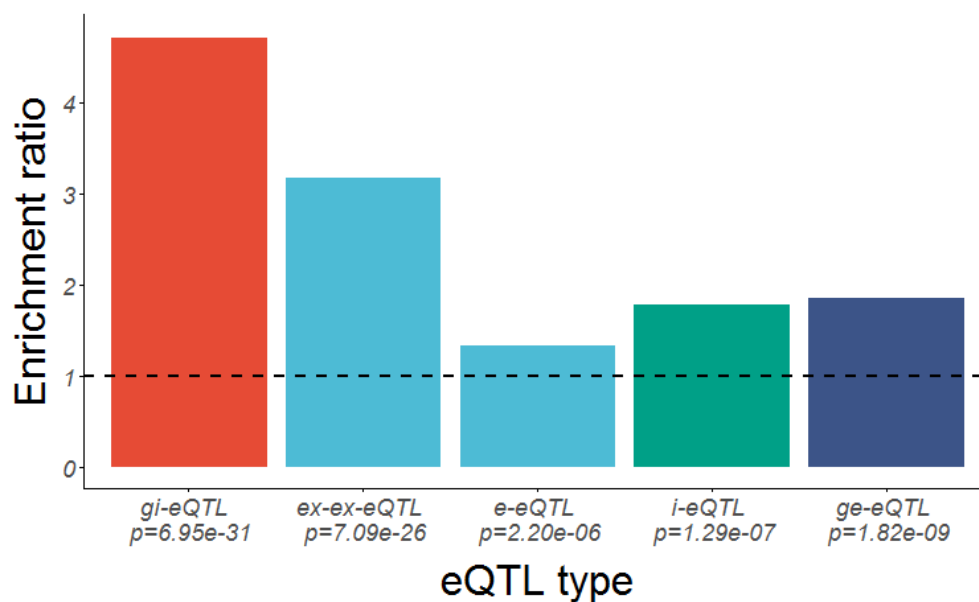

Supplementary Figure 3

Enrichment of risk loci for neurological and behavioural disorders across all eQTL classes. Source data are provided as a Source Data file.

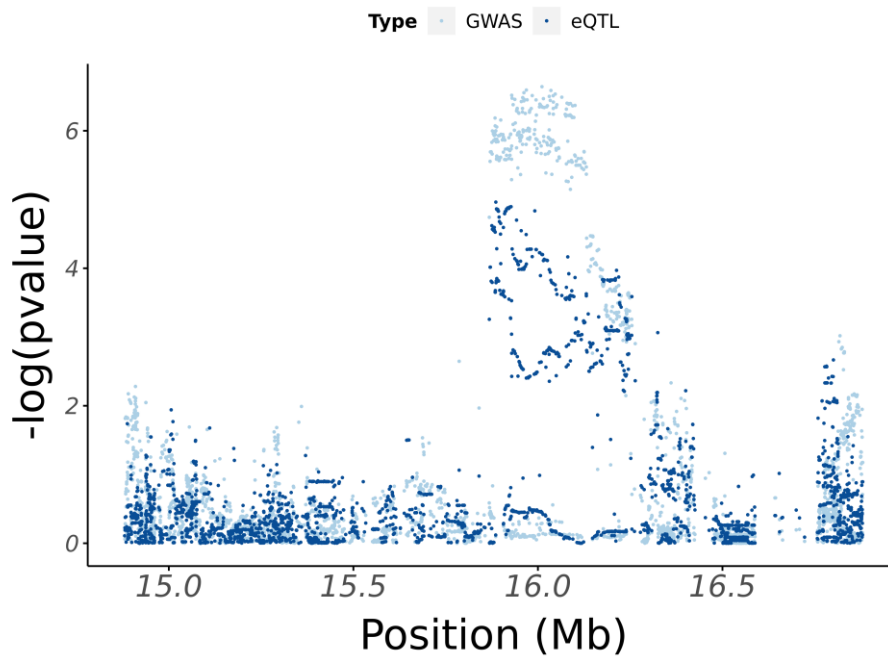

#### Supplementary Figure 4

Colocalisation of the PD GWAS lead SNP SNP rs4566208 (GWAS p-value =  $2.28 \times 10^{-7}$ ) and the i-eQTL targeting DER38036 (i-eQTL p-value =  $1.09 \times 10^{-5}$  in putamen). Source data are provided as a Source Data file.

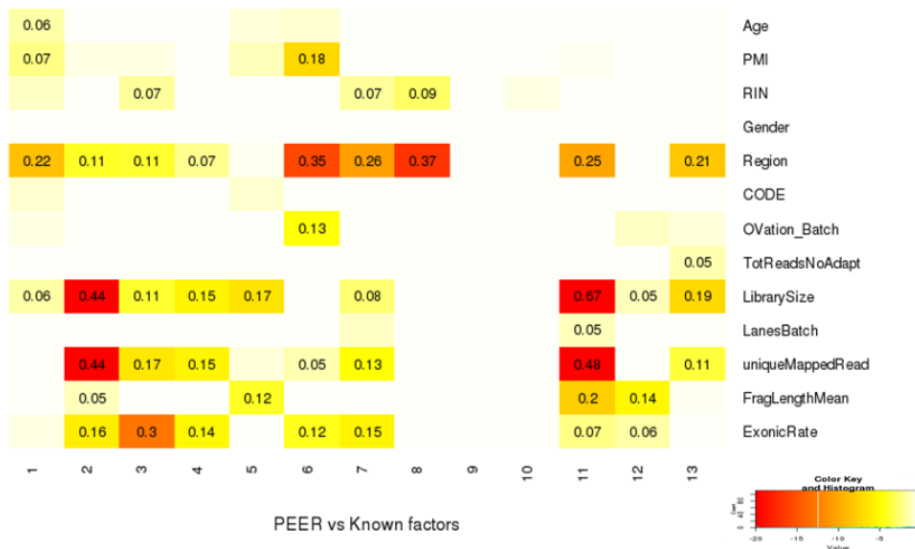

#### Supplementary Figure 5

Heatmap to show the relationship between PEER axes (X-axis) and known covariates (Y-axis). The FDR-corrected p-values for correlations between each PEER axis and known

factor are depicted by the colour of ea. The Pearson  $R^2$  values are displayed within each cell. Source data are provided as a Source Data file.

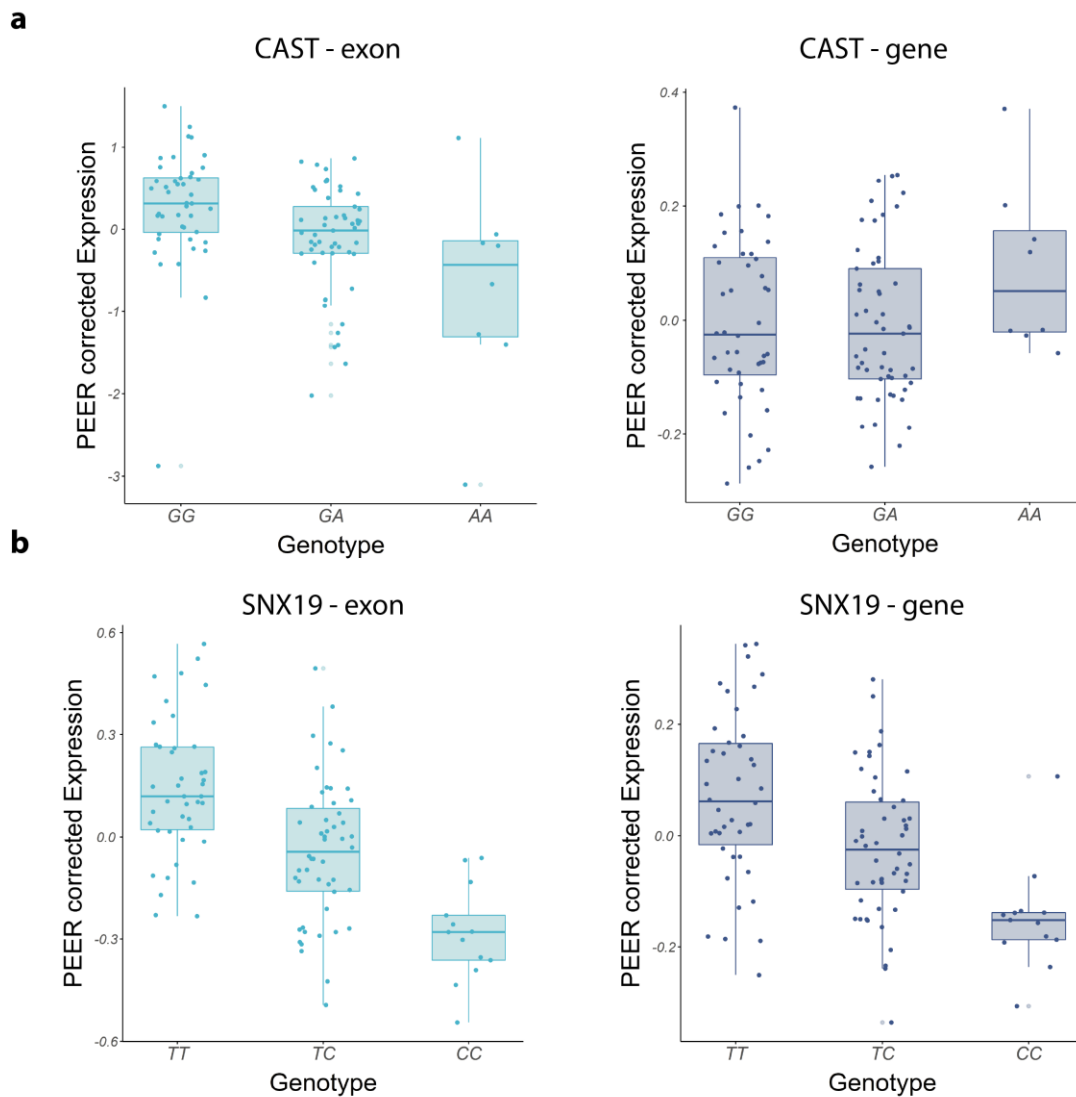

### Supplementary Figure 6

Allele-specific expression sites capture both splicing and gene level cis-regulation. (a) Some ASEs appear to operate in an exon-specific manner, and likely represent splicing QTLs. Expression of the exon containing rs7724759, a splice variant present in the *CAST* gene, across individuals of all three genotypes demonstrates that the dosage of the splice variant impacts on exon expression. However, *CAST* gene-level expression across individuals of all three genotypes is unaffected by the dosage of the splice variant. (b) Some ASEs appeared to operate in a gene-level manner. Expression of the exon containing rs1050078, a variant present in the *SNX19* gene, and *SNX19* gene-level expression across individuals of all three genotypes demonstrates a similar dosage relationship. Data presented using Tukey-style box plots. Source data are provided as a Source Data file.
