# Supplementary material for: Regulatory sites for splicing in human basal ganglia are enriched for disease-relevant information
Source: PubMed Central journal article supplement (PMC7042265; doi:10.1038/s41467-020-14483-x), 2020-02-25
Supplement: 41467_2020_14483_MOESM3_ESM.pdf [file 41467_2020_14483_MOESM3_ESM.pdf]

**Title: Supplementary Data 1**

**Description:** Table summarising brain samples used for the generation of RNAseq data

**Title: Supplementary Data 2**

**Description:** Table of gene-intronic eQTLs (gi-eQTLs) at FDR <5%

**Title: Supplementary Data 3**

**Description:** Table of exonic eQTLs (e-eQTLs) at FDR <5%

**Title: Supplementary Data 4**

**Description:** Table of exon-exon junction eQTLs (ex-ex-eQTLs) at FDR <5%

**Title: Supplementary Data 5**

**Description:** Table of gene-exonic eQTLs (ge-eQTLs) at FDR <5%

**Title: Supplementary Data 6**

**Description:** Table of intergenic eQTLs (i-eQTLs) at FDR <5%

**Title: Supplementary Data 7**

**Description:** Cell type-specific enrichments of eQTL target regions

**Title: Supplementary Data 8**

**Description:** i-eQTLs colocalising with GWAS loci for schizophrenia and Parkinson's Disease

**Title: Supplementary Data 9**

**Description:** Table of ASEs identified in putamen and substantia nigra with a MAF > 5%

**Title: Supplementary Data 10**

**Description:** Enrichment of PD and schizophrenia heritability amongst ASEs using stratified LD score regression
